# Supplementary material
Source: Springer Nature journal article supplement (https://www.springermedizin.de/resource/supplementary/12877_2007_81_MOESM1_ESM.pdf/9441128)
Supplement: MOESM1 [file 9441128]

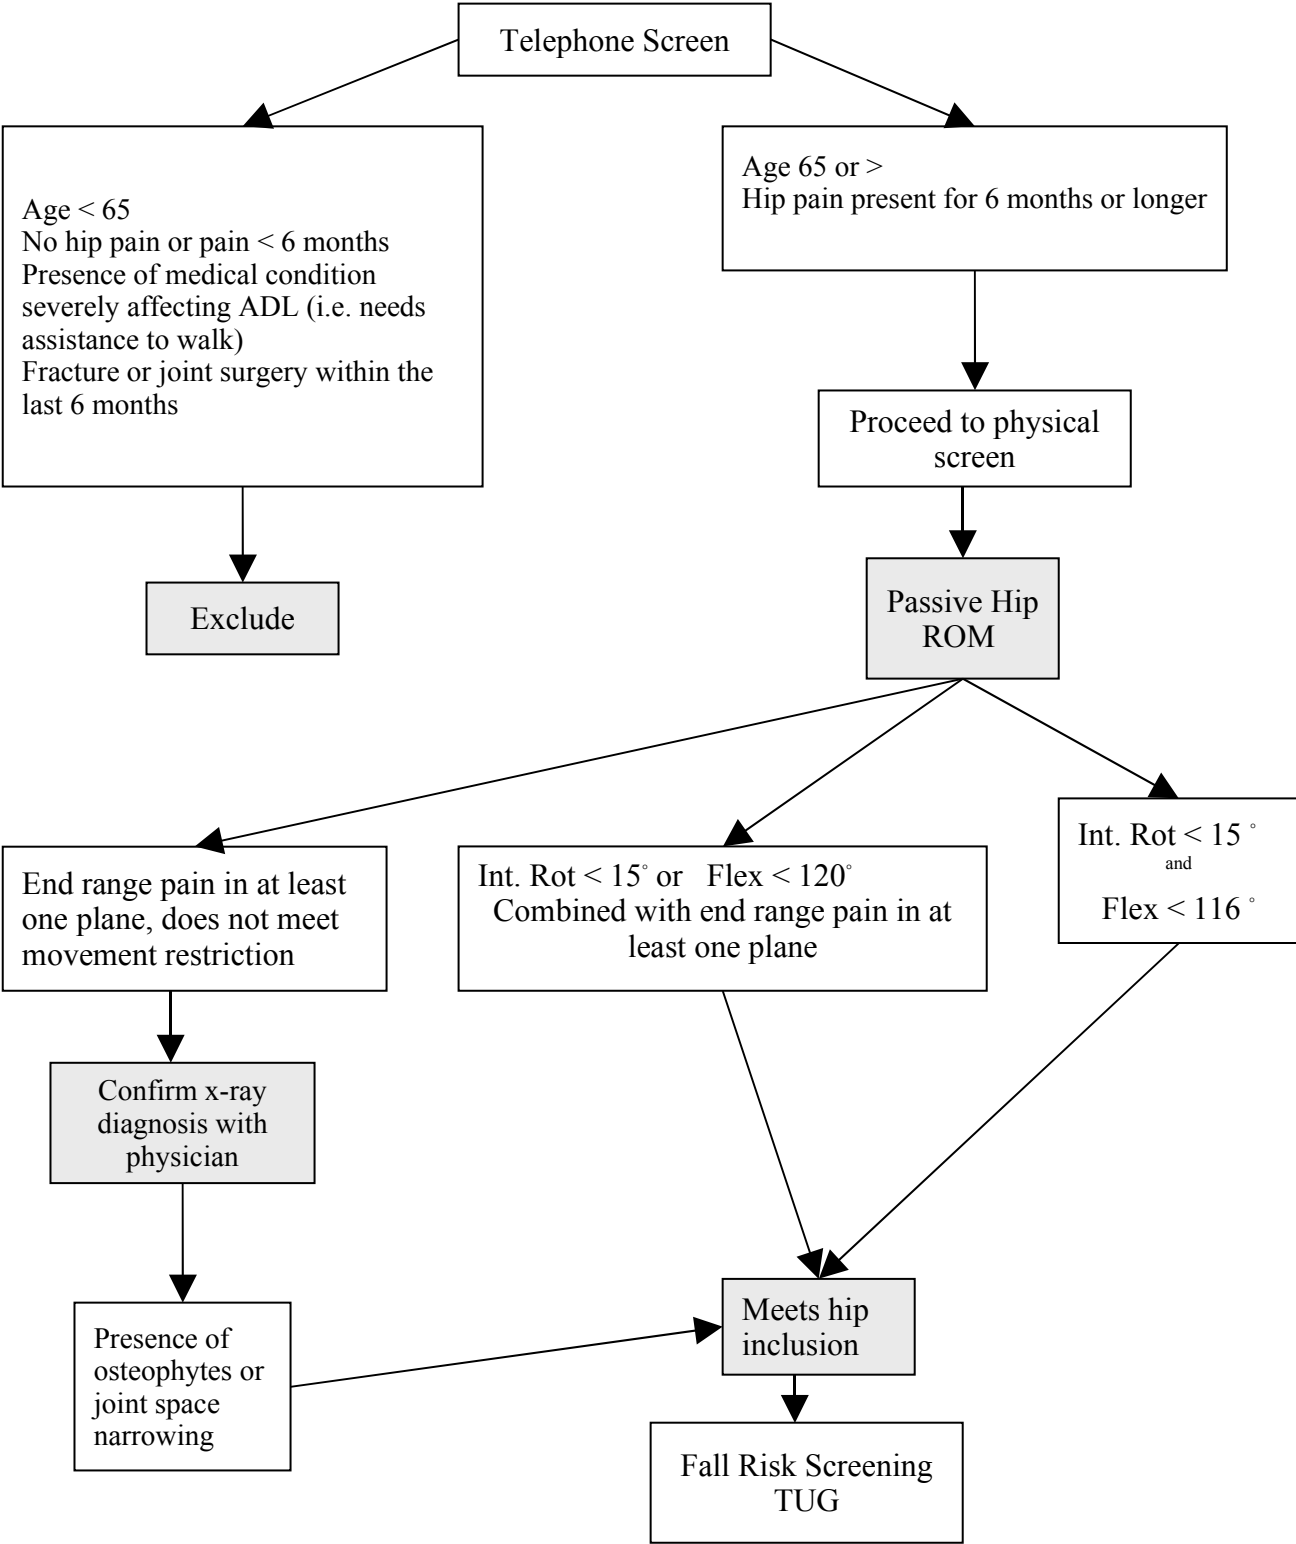

Telephone Screen

Age < 65  
No hip pain or pain < 6 months  
Presence of medical condition  
severely affecting ADL (i.e. needs  
assistance to walk)  
Fracture or joint surgery within the  
last 6 months

Exclude

Age 65 or >  
Hip pain present for 6 months or longer

Proceed to physical screen

Passive Hip ROM

End range pain in at least  
one plane, does not meet  
movement restriction

Confirm x-ray  
diagnosis with  
physician

Presence of  
osteophytes or  
joint space  
narrowing

Int. Rot < 15° or Flex < 120°  
Combined with end range pain in at  
least one plane

Int. Rot < 15°  
and  
Flex < 116°

Meets hip  
inclusion

Fall Risk Screening  
TUG
